# Supplementary material for: Single-Stage Revision Surgery in Infected Total Knee Arthroplasty: A PRISMA Systematic Review
Source: MDPI journal article supplement (doi:10.3390/jcm8020174), 2019-02-02
Supplement: s1 [file s1]

*Appendix A - Risk Of Bias*

| Study                   | Confounding | Selection | Intervention<br>Measurment | Missing Data | Outcome<br>Measurement | Reported<br>Results | Overall  |
|-------------------------|-------------|-----------|----------------------------|--------------|------------------------|---------------------|----------|
| Castellani et al.       | moderate    | Low       | moderate                   | Low          | Low                    | Low                 | Low      |
| Akgun et al.            | moderate    | Low       | moderate                   | Low          | Low                    | Low                 | Low      |
| Ji et al.               | moderate    | Low       | moderate                   | Low          | Low                    | Low                 | Low      |
| Li H et al.             | moderate    | Low       | moderate                   | Low          | low                    | low                 | low      |
| Massin et al.           | moderate    | Low       | moderate                   | Low          | Low                    | moderate            | moderate |
| Jenny et al. (2016)     | moderate    | Low       | moderate                   | Low          | low                    | moderate            | moderate |
| Cochran et al.          | low         | Low       | low                        | Low          | Low                    | Low                 | Low      |
| Zahar A et al           | moderate    | Low       | low                        | Low          | Low                    | Low                 | Low      |
| Haddad et al.           | moderate    | Low       | moderate                   | Low          | Low                    | Low                 | Low      |
| Cury Rde P et al.       | moderate    | Moderate  | Low                        | moderate     | low                    | low                 | moderate |
| Tibrewal et al.         | low         | low       | low                        | low          | low                    | low                 | low      |
| Klatte et al.           | moderate    | low       | low                        | moderate     | low                    | low                 | low      |
| Shanmugasundaram et al. | low         | low       | low                        | low          | low                    | low                 | low      |
| Baker et al.            | low         | low       | moderate                   | moderate     | low                    | low                 | moderate |
| Jenny et al. (2013)     | moderate    | low       | low                        | low          | low                    | moderate            | moderate |
| Singer et al.           | moderate    | low       | low                        | low          | low                    | low                 | low      |
| Whiteside et al.        | moderate    | low       | low                        | low          | low                    | low                 | low      |

Note: Moderate=the study is sound for a non-randomized study with regard to this domain but cannot be considered comparable to a well-performed randomized trial;  
 Low=the study is comparable to a well-performed randomized trial with regard to this domain

*Appendix B – GRADE Quality*

| Author            | Study design                  | Risk of Bias | Inconsistency | Indirectness | Imprecision | Publication bias | Large effect (RR%) | Plausible confounding         | Quality         |
|-------------------|-------------------------------|--------------|---------------|--------------|-------------|------------------|--------------------|-------------------------------|-----------------|
| Castellani et al. | Retrospective Cohort          | Low          | Not serious   | Not serious  | serious     | Undetected       | N/A                | Would suggest spurious effect | ⊕⊕⊕⊕<br>High    |
| Ji et al.         | Retrospective Case Series     | Low          | Not serious   | Not serious  | serious     | serious          | N/A                |                               | ⊕⊕⊕<br>Moderate |
| Li H et al.       | Retrospective Cohort          | Low          | Not serious   | serious      | Not serious | Undetected       | N/A                | No                            | ⊕⊕⊕⊕<br>High    |
| Massin et al.     | Retrospective Cohort          | Moderate     | Serious       | Not serious  | Not serious | Undetected       | N/A                | No                            | ⊕⊕⊕<br>Moderate |
| Jenny et al. 2016 | Retrospective case-control    | Moderate     | serious       | Not serious  | Not serious | Not serious      | N/A                | No                            | ⊕⊕⊕<br>Moderate |
| Cochran et al.    | Retrospective Cohort registry | Low          | Not serious   | Not serious  | Not serious | serious          | N/A                | No                            | ⊕⊕⊕⊕<br>High    |

|                         |                                     |          |             |             |             |             |     |                                      |                 |
|-------------------------|-------------------------------------|----------|-------------|-------------|-------------|-------------|-----|--------------------------------------|-----------------|
| Zahar A et al.          | Retrospective Cohort                | Low      | Not serious | Not serious | serious     | Not serious | N/A | No                                   | ⊕⊕⊕⊕<br>High    |
| Haddad et al.           | Retrospective Cohort                | Low      | serious     | Not serious | Not serious | Not serious | N/A | No                                   | ⊕⊕⊕⊕<br>High    |
| Cury Rde P et al.       | Retrospective Cohort                | Moderate | Not serious | Not serious | serious     | serious     | N/A | No                                   | ⊕⊕⊕<br>Moderate |
| Tibrewal et al.         | Prospective Cohort                  | low      | serious     | Not serious | Not serious | Not serious | N/A | No                                   | ⊕⊕⊕⊕<br>High    |
| Klatte et al.           | Retrospective Cohort                | Low      | Not serious | Not serious | serious     | serious     | N/A | Would reduce the demonstrated effect | ⊕⊕⊕<br>Moderate |
| Shanmugasundaram et al. | Retrospective Cohort                | Low      | Not serious | Not serious | serious     | serious     | N/A | No                                   | ⊕⊕⊕<br>Moderate |
| Baker et al.            | Prospective Cohort                  | Moderate | Not serious | Not serious | Not serious | Not serious | N/A | No                                   | ⊕⊕⊕⊕<br>High    |
| Jenny et al. (2013)     | Observational Cohort<br>Prospective | Moderate | Not serious | Not serious | Not serious | Not serious | N/A | No                                   | ⊕⊕⊕⊕<br>High    |

|                  |                              |     |             |             |             |             |     |    |              |
|------------------|------------------------------|-----|-------------|-------------|-------------|-------------|-----|----|--------------|
| Singer et al.    | Descriptive<br>Retrospective | Low | Not serious | Not serious | Not serious | Not serious | N/A | No | ⊕⊕⊕⊕<br>High |
| Whiteside et al. | Retrospective<br>Cohort      | Low | Not serious | Not serious | Not serious | Not serious | N/A | No | ⊕⊕⊕⊕<br>High |

“Very low”; the true effect is probably markedly different from the estimated effect, “Low”; The true effect might be markedly different from the estimated effect, “Moderate”; the authors believe that the true effect is probably close to the estimated effect, “High”; the authors have a lot of confidence that the true effect is similar to the estimated effect
